# Supplementary material for: Emulsion-polymerized flexible semi-conducting CNCs–PANI–DBSA nanocomposite films
Source: Royal Society of Chemistry journal article supplement (doi:10.1039/c6ra13610a), 2016-01-01
Supplement: c6ra13610a1.pdf [file c6ra13610a1.pdf]

## Supplementary Information

### Emulsion-polymerized flexible semi-conducting CNCs-PANI-DBSA nanocomposite films

Siham Atifi<sup>a</sup> and Wadood Y. Hamad<sup>a\*</sup>

<sup>a</sup> FPInnovations, 2665 East Mall, Vancouver, BC, Canada V6T 1Z4

\*Corresponding author: [Wadood.hamad@fpinnovations.ca](mailto:Wadood.hamad@fpinnovations.ca). Tel. +1+604+225+5839

**Table S1.** Onset degradation temperatures, obtained by TGA(a), of air-dried CNCs-PANI-DBSA nanocomposite films prepared at different DBSA:aniline molar ratios compared to PANI-DBSA.

| Sample ID | Mass ratio,<br>CNCs:aniline | Molar ratio,<br>DBSA:aniline | Onset degradation temperature (°C) |        |        |
|-----------|-----------------------------|------------------------------|------------------------------------|--------|--------|
|           |                             |                              | A                                  | B      | C      |
| A         | 2                           | 0.25                         | 150.15                             | -      | -      |
| B         | 2                           | 0.5                          | 178.03                             | 289.18 | 447.01 |
| C         | 2                           | 1                            | 181.52                             | 290.36 | 451.96 |
| D         | 2                           | 1.5                          | 184.65                             | 292.26 | 446.09 |
| E         | 1                           | 2                            | 188.91                             | 279.72 | 432.06 |
| F         | 2                           | 2                            | 189.18                             | 290.23 | 454.02 |
| G         | 5                           | 2                            | 189.73                             | 292.17 | 473.77 |
| PANI-DBSA | 0                           | 1                            | -                                  | 289.47 | 424.32 |

<sup>(a)</sup> TGA was measured for samples doped with HCl (1N) for 24 hours and dried at room temperature.

The onset degradation temperature, measured by TGA, for neat CNCs (H-form) was around 162°C.

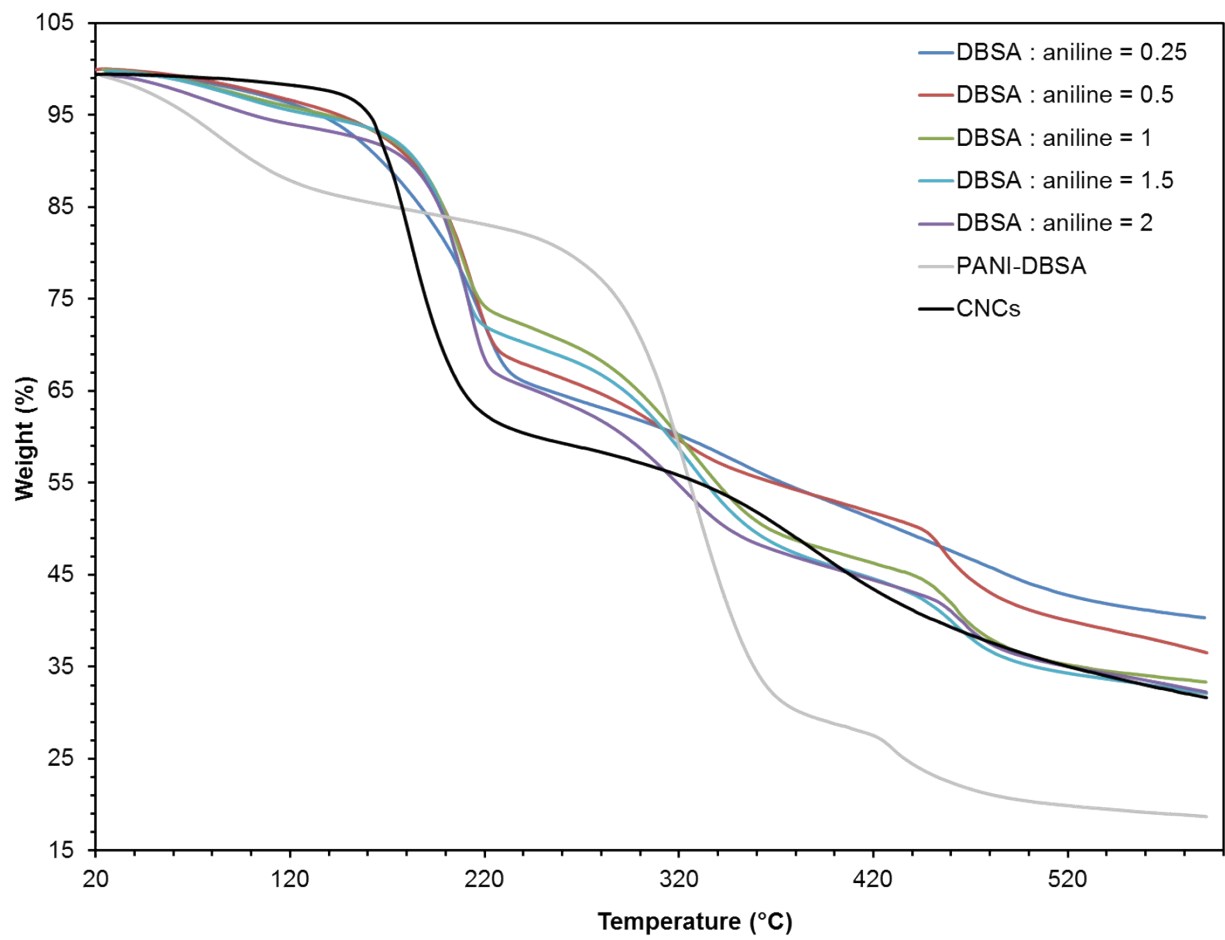

**Figure S1.** TGA curves of air-dried CNCs-PANI DBSA nanocomposite films compared to CNCs and PANI-DBSA.

Sample: SA-IV-88-B\_DOPED  
Size: 6.4310 mg  
Method: Ramp

TGA

File: C:\...11-Doped\SA-IV-88-B\_DOPED.001  
Operator: SIHAM  
Run Date: 19-Jun-2012 13:58  
Instrument: TGA Q50 V6.5 Build 196

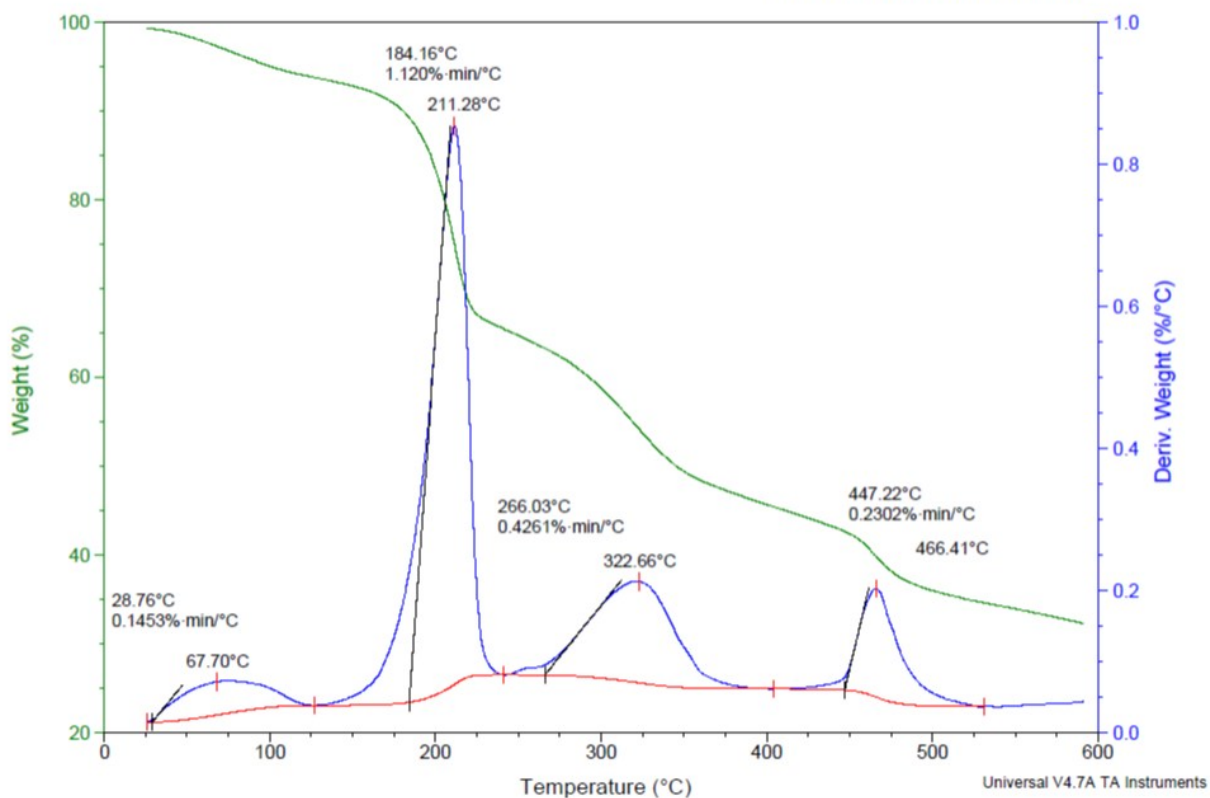

**Figure S2.** Integrals of areas under DTGA degradation peaks for a typical air-dried CNCs-PANI-DBSA nanocomposite film (molar ratio, DBSA:aniline=2 and mass ratio CNCs:aniline=2).

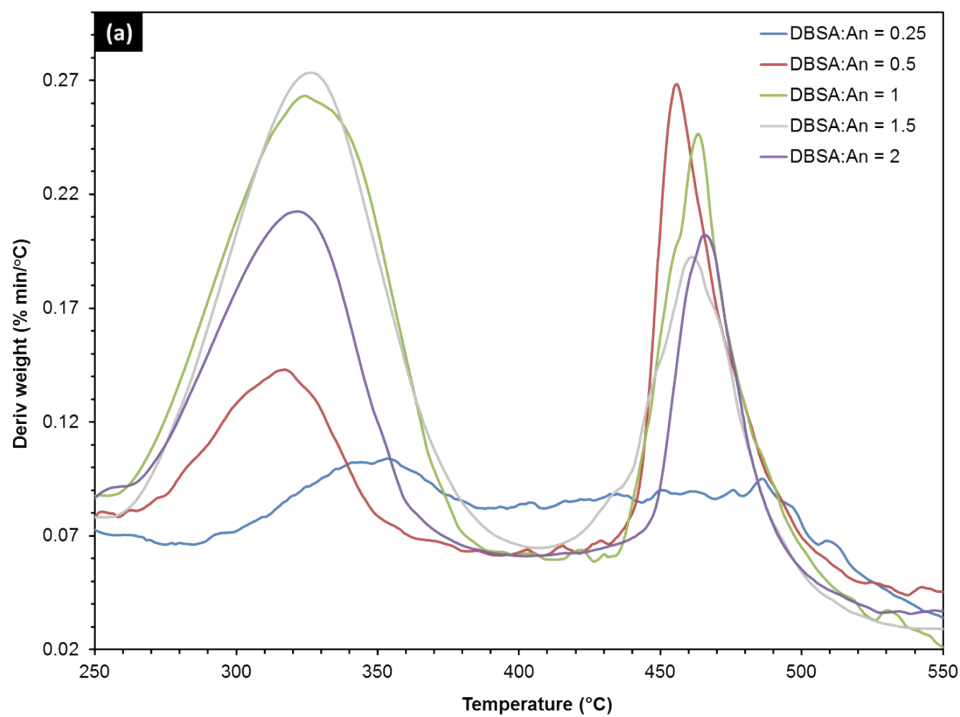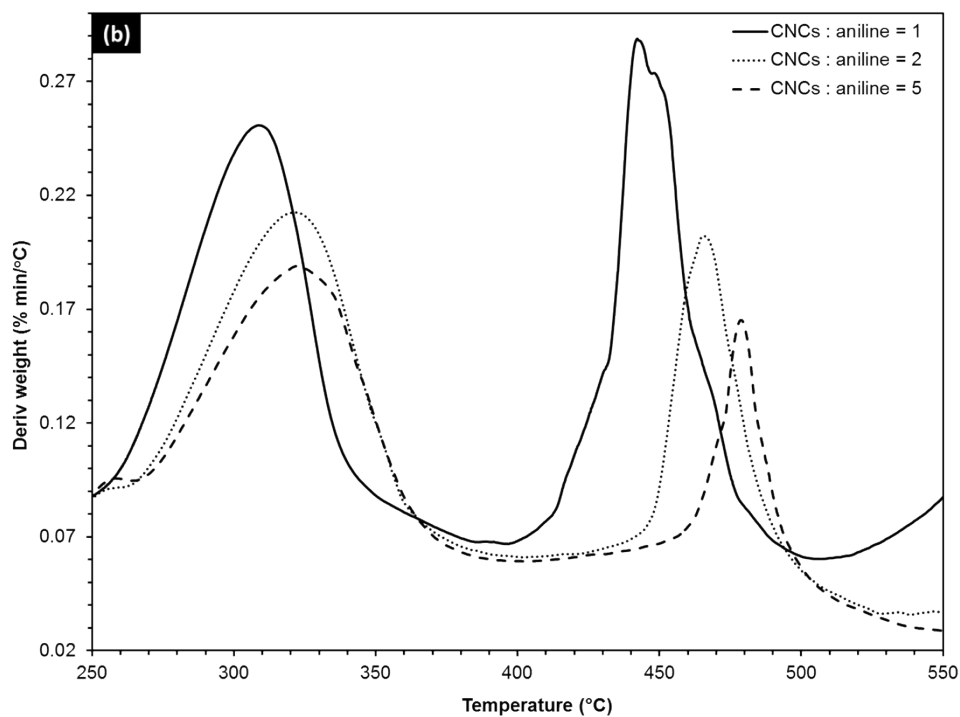

**Figure S3.** DTGA response curves, at onset degradation temperatures, illustrate the effects of DBSA (a) and CNCs (b) concentrations on polyaniline formation. The relevant onset degradation temperatures commence at 290°C, which is dominated by the degradation of excess DBSA and polyaniline oxidation, and at 420°C, dominated by the degradation of bound DBSA and the decomposition of the polyaniline backbone.
